# Supplementary material
Source: publisher site journal article supplement (https://www.dovepress.com/get_supplementary_file.php?f=+396806.docx)
Supplement: Supplementary file 1 [file get_supplementary_file.php]

**Supplementary Table 1. Variation in the input parameters evaluated in the deterministic sensitivity analysis**

| **Parameter** | **Variation evaluated** |
| --- | --- |
| Baseline PANSS scorea | ±50% |
| PANSS score at month 3 on AS | ±50% |
| PANSS score at month 6 on AS | ±50% |
| Baseline medication adherencea | ±50% |
| Medication adherence at month 3 on AS | ±50% |
| Medication adherence at month 6 on AS | ±50% |
| Rate of psychiatric hospitalization | ±70% |
| Length of psychiatric hospital stay | ±30% |
| Outpatient visits | ±30% |
| Laboratory testing | ±30% |
| Emergency/crisis center | ±30% |
| Psychiatric hospitalization cost | ±20% |
| Outpatient cost | ±20% |
| Laboratory testing cost | ±20% |
| Emergency/crisis center cost | ±20% |
| Absence from work (% patients) | ±25% |
| Unemployment (% patients) | ±25% |
| Premature death | ±25% |
| Informal care (% patients) | ±25% |
| Reduction in indirect costs with Abilify MyCite | ±50% |

**Abbreviations:** AAP, atypical antipsychotic; AS, aripiprazole tablets with a sensor; PANSS, Positive and Negative Symptom Scale

aBaseline PANSS and medication adherence were based on the results of the retrospective part of the MONARCH study

Note: Utilities were based on the PANSS score and, therefore, the impact of the uncertainty in the utility estimated could not be evaluated in the deterministic sensitivity analysis.

**Supplementary Table 2. Breakdown of costs for patients on AS versus oral AAPs estimated using PANSS scores and treatment status (2021 USD)**

| **Cost component** | **6 months** | | **12 months** | |
| --- | --- | --- | --- | --- |
| **AS** | **Oral AAPs** | **AS** | **Oral AAPs** |
| Treatment | $7,142 | $154 | $13,481 | $309 |
| Hospitalization | $197 | $5,528 | $452 | $11,070 |
| Other direct medicala | $2,560 | $2,748 | $5,111 | $5,497 |
| Indirectb | $26,357 | $38,612 | $52,713 | $77,225 |
| **Total cost** | **$36,255** | **$47,042** | **$71,757** | **$94,101** |

**Abbreviations:** AAP, atypical antipsychotic; AS, aripiprazole tablets with sensor; PANSS, Positive and Negative Symptom Scale

aOther direct medical costs include outpatient, emergency department/crisis center, and laboratory testing costs

bIndirect costs include costs due to productivity loss, activity impairment, and caregiving
